# Supplementary material for: Identifying reactive normal modes and their effect on regioselectivity in Myers–Saito and Schmittel cyclization of enyne–allenes: a combined perspective between the reaction force constant and statistical tools
Source: Royal Society of Chemistry journal article supplement (doi:10.1039/d4cp03431g), 2024-11-19
Supplement: d4cp03431g1.pdf [file d4cp03431g1.pdf]

# Identifying Active Normal Modes in Competitive Myers-Saito and Schmittel Cyclizations in Enyne-Allenenes From a Combined Perspective Between the Reaction Force Constant and Statistical Tools

Andrés F. Flor-López,<sup>a,b</sup> Ricardo A. Matute,<sup>c,d\*</sup> and Pablo Jaque<sup>a,b\*</sup>

<sup>(a)</sup> Departamento de Química Orgánica y Físicoquímica, Facultad de Ciencias Químicas y Farmacéuticas, Universidad de Chile.

<sup>(b)</sup> Centro de Modelamiento Molecular, Biofísica y Bioinformática, CM2B2, Universidad de Chile, Sergio Livingstone 1007, Independencia, Santiago, Chile.

<sup>(c)</sup> Departamento de Química, Universidad Técnica Federico Santa María, Valparaíso 2340000, Chile

<sup>(d)</sup> Noyes Laboratory of Chemical Physics, Division of Chemistry and Chemical Engineering, California Institute of Technology – Caltech

\* E-mail: [pablo.jaque@ciq.uchile.cl](mailto:pablo.jaque@ciq.uchile.cl); [rmatute@caltech.edu](mailto:rmatute@caltech.edu)

## List of Tables:

|                                                                                                                                                                                             |    |
|---------------------------------------------------------------------------------------------------------------------------------------------------------------------------------------------|----|
| <b>Table S1.</b> Overall, activation and relative Gibbs free energies for Myers-Saito (path- <b>a</b> ) and Schmittel (path- <b>b</b> ) cyclization. All values are given in kcal/mol. .... | 2  |
| <b>Table S2.</b> Validation criteria of PLS-VIP regressions in both set A and B. ....                                                                                                       | 4  |
| <b>Table S3.</b> PLS-VIP regressions with step size 0.03 amu <sup>1/2</sup> Bohr in system <b>3</b> and system <b>6</b> . ....                                                              | 5  |
| <b>Table S4.</b> Validation criteria of PLS-VIP regressions with step size 0.03 amu <sup>1/2</sup> in system <b>3</b> and <b>6</b> . ..                                                     | 6  |
| <b>Table S5.</b> Vibrational character of Bz <sub>1</sub> substructure. ....                                                                                                                | 7  |
| <b>Table S6.</b> Vibrational character of Bz <sub>2</sub> substructure. ....                                                                                                                | 9  |
| <b>Table S7.</b> Vibrational character of Bz <sub>3</sub> substructure. ....                                                                                                                | 11 |
| <b>Table S8.</b> Vibrational character of Al substructure. ....                                                                                                                             | 13 |
| <b>Table S9.</b> Vibrational character of Ac substructure. ....                                                                                                                             | 14 |
| <b>Table S10.</b> Vibrational character of Et substructure. ....                                                                                                                            | 15 |

## List of Figures:

|                                                                                                                                                                                                                                                                                                    |    |
|----------------------------------------------------------------------------------------------------------------------------------------------------------------------------------------------------------------------------------------------------------------------------------------------------|----|
| <b>Figure S1.</b> Linear correlation between free energy difference ( $\Delta\Delta G^\ddagger$ ) and electronic energy difference ( $\Delta\Delta E^\ddagger$ ), energy values in kcal/mol. ....                                                                                                  | 2  |
| <b>Figure S2.</b> Comparative activation diagrams along $\xi$ projected onto dihedral C <sub>14</sub> -C <sub>15</sub> -C <sub>16</sub> -C <sub>17</sub> angle in Bz <sub>2</sub> substructure. ....                                                                                               | 3  |
| <b>Figure S3.</b> Comparative activation diagrams along $\xi$ projected onto variations of C <sub>2</sub> -C <sub>1</sub> -C <sub>14</sub> ( <b>a</b> ), C <sub>7</sub> -C <sub>8</sub> -C <sub>9</sub> ( <b>b</b> ) and C <sub>1</sub> -C <sub>14</sub> -C <sub>15</sub> ( <b>c</b> ) angle. .... | 3  |
| <b>Figure S4.</b> Reaction force constant $\kappa(\xi)$ and $k^1$ along the transition regions. ....                                                                                                                                                                                               | 5  |
| <b>Cartesian coordinates of Transition States:</b> .....                                                                                                                                                                                                                                           | 17 |

**Table S1.** Overall, activation and relative Gibbs free energies for Myers-Saito (path-a) and Schmittel (path-b) cyclization. All values are given in kcal/mol.

| path-a    | $\Delta G^\ddagger$ | $\Delta G^o$ | path-b    | $\Delta G^\ddagger$ | $\Delta G^o$ | $\Delta\Delta G^\ddagger$ | $\Delta\Delta G^o$ |
|-----------|---------------------|--------------|-----------|---------------------|--------------|---------------------------|--------------------|
| <b>1a</b> | 25.87               | 5.46         | <b>1b</b> | 30.87               | 15.25        | 5.00                      | 9.79               |
| <b>2a</b> | 28.60               | 10.96        | <b>2b</b> | 30.68               | -26.28       | 2.08                      | -37.25             |
| <b>3a</b> | 28.70               | 11.07        | <b>3b</b> | 29.30               | -30.15       | 0.60                      | -41.22             |
| <b>4a</b> | 28.04               | 10.94        | <b>4b</b> | 27.43               | -33.88       | -0.61                     | -44.82             |
| <b>5a</b> | 31.93               | 16.02        | <b>5b</b> | 34.29               | 15.82        | 2.37                      | -0.21              |
| <b>6a</b> | 29.20               | 1.05         | <b>6b</b> | 27.84               | 8.86         | -1.35                     | 7.82               |
| <b>7a</b> | 31.72               | 5.39         | <b>7b</b> | 29.41               | 22.82        | -2.31                     | 17.43              |

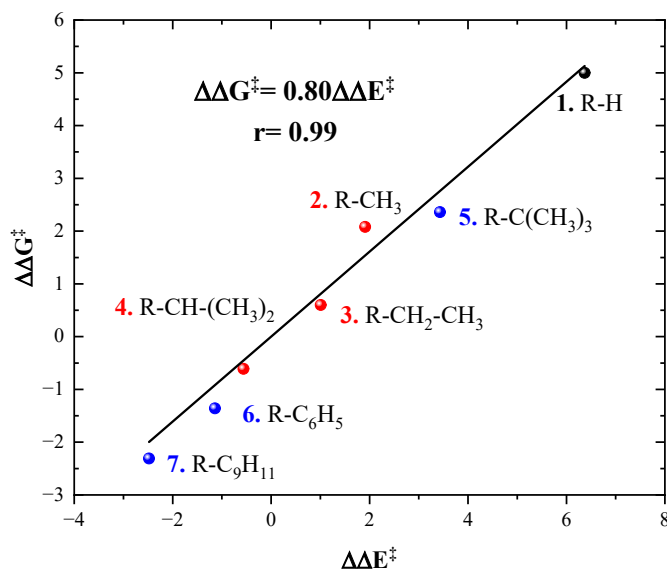

**Figure S1.** Linear correlation between free energy difference ( $\Delta\Delta G^\ddagger$ ) and electronic energy difference ( $\Delta\Delta E^\ddagger$ ), energy values in kcal/mol.

The vibrational contributions out-of-plane Bz<sub>2</sub> for Myers-Saito and Schmittel cyclization are considered negligible due to the marginal C<sub>14</sub>-C<sub>15</sub>-C<sub>16</sub>-C<sub>17</sub> dihedral variation for all paths (<1° in Figure S2).

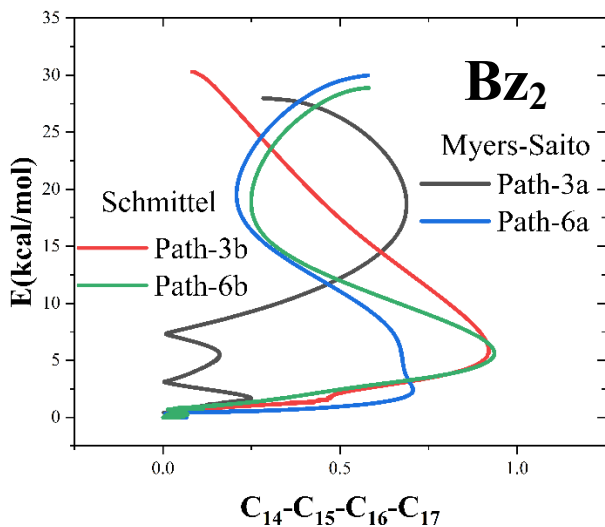

**Figure S2.**Comparative activation diagrams along  $\xi$  projected onto dihedral  $C_{14}-C_{15}-C_{16}-C_{17}$  angle in  $Bz_2$  substructure.

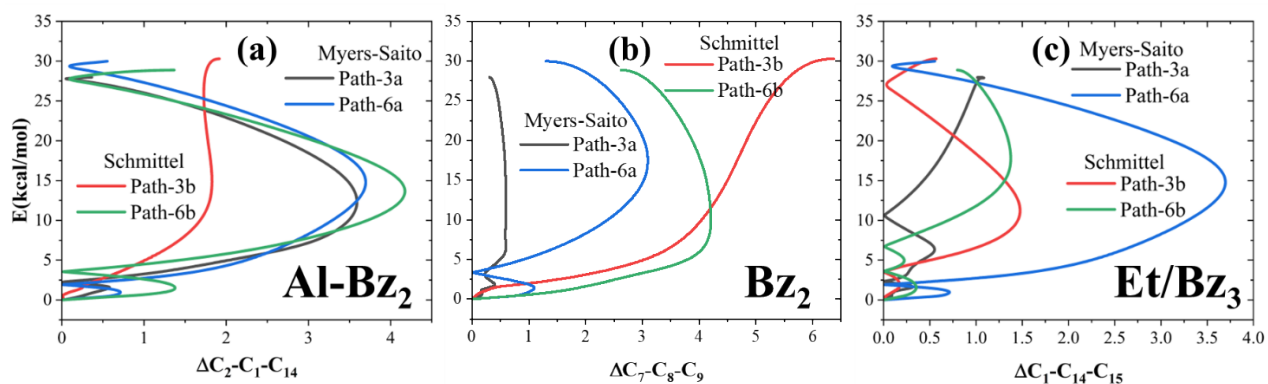

**Figure S3.**Comparative activation diagrams along  $\xi$  projected onto variations of  $C_2-C_1-C_{14}$  (a),  $C_7-C_8-C_9$  (b) and  $C_1-C_{14}-C_{15}$  (c) angle.

**Table S2.** Validation criteria of PLS-VIP regressions in both set A and B.

| <b>Path</b> | $\sigma^2 k_i$ | $\sigma^2$<br>$\kappa_Y(\xi); Y = a,$ | <b>RSS</b>             | <b>R<sup>2</sup></b> | $\# \kappa_Y(\xi)$<br>$Y = a, b$ | $k_i$ | <b>Factors</b> |
|-------------|----------------|---------------------------------------|------------------------|----------------------|----------------------------------|-------|----------------|
| <b>1a</b>   | 81.5 %         | 99.3 %                                | 0.013                  | 0.999                | 24                               | 81    | 3              |
| <b>2a</b>   | 74.4 %         | 96.2 %                                | 0.072                  | 0.998                | 38                               | 90    | 4              |
| <b>3a</b>   | 99.3%          | 96.7 %                                | 0.013                  | 0.999                | 25                               | 99    | 7              |
| <b>4a</b>   | 99.9%          | 99.9%                                 | $1.4 \times 10^{-7}$   | 0.999                | 21                               | 108   | 17             |
| <b>3a</b>   | 99.3%          | 96.7 %                                | 0.013                  | 0.999                | 25                               | 99    | 7              |
| <b>5a</b>   | 98.8 %         | 99.8 %                                | 0.004                  | 0.999                | 24                               | 117   | 9              |
| <b>6a</b>   | 99.9 %         | 99.9 %                                | $< 1.4 \times 10^{-7}$ | 0.999                | 13                               | 111   | 13             |
| <b>7a</b>   | 68.8%          | 88.6%                                 | 0.24                   | 0.88                 | 24                               | 138   | 2              |
| <b>1b</b>   | 91.3 %         | 98.6 %                                | 0.026                  | 0.998                | 21                               | 81    | 4              |
| <b>2b</b>   | 98.9%          | 98.0 %                                | 0.118                  | 0.991                | 49                               | 90    | 13             |
| <b>3b</b>   | 96.7%          | 99.9%                                 | 0.0008                 | 0.999                | 48                               | 99    | 7              |
| <b>4b</b>   | 89.9%          | 98.5%                                 | 0.062                  | 0.996                | 46                               | 108   | 7              |
| <b>5b</b>   | 98.7 %         | 99.9 %                                | 0.014                  | 0.998                | 14                               | 117   | 8              |
| <b>6b</b>   | 98.9%          | 98.0 %                                | $1.5 \times 10^{-5}$   | 0.999                | 21                               | 111   | 15             |
| <b>7b</b>   | 98.6%          | 99.8%                                 | 0.004                  | 0.998                | 23                               | 138   | 9              |

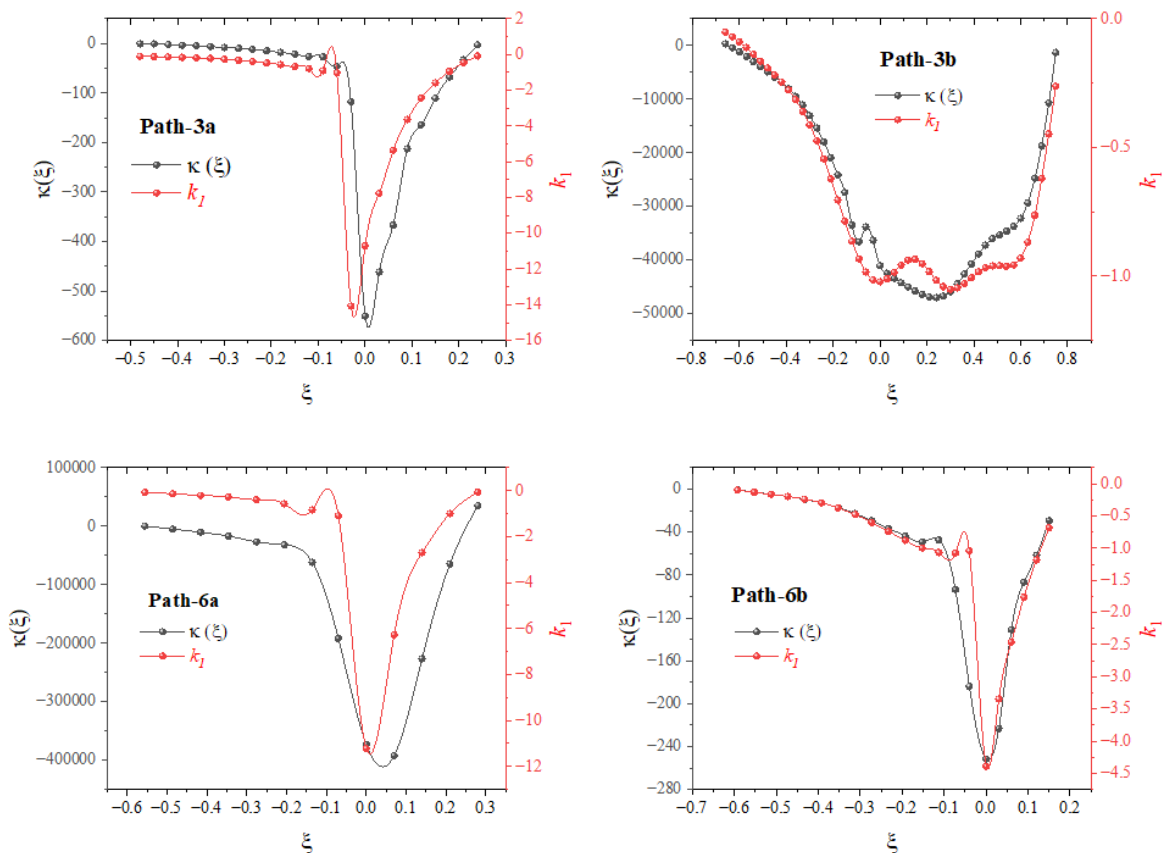

**Figure S4.** Reaction force constant  $\kappa(\xi)$  and  $k_1$  along the transition regions.

**Table S3.** PLS-VIP regressions with step size  $0.03 \text{ amu}^{1/2} \text{ Bohr}$  in system **3** and system **6**.

---



---

**PLS-VIP correlations**

---

$$\begin{aligned} \kappa_{3a}(\xi) &= 2.68k_{48} - 0.74k_{67} + 2.3k_{72} + 0.18k_1 - 0.18k_2 + 257.7k_{97} + 773.4k_{96} + 773.4k_{90} + \\ & 5.1k_{23} + 95.9 \end{aligned}$$

$$\begin{aligned} \kappa_{6a}(\xi) &= 0.24k_1 - 3.1k_{35} + 2.4k_{36} + 13.4k_{31} - 17.6k_{14} - 6.8k_{85} - 0.5k_{79} + 1.4k_{84} - 7.7k_{65} + \\ & .7k_{15} + 84.8 \end{aligned}$$

$$\begin{aligned} \kappa_{3b}(\xi) &= 3.2k_1 - 45.8k_7 - 278.4k_3 - 7.7k_{18} - 49.1k_{13} - 1.7k_{69} - 0.98k_{73} - 0.51k_{40} + 6.8k_{54} - \end{aligned}$$

$$\begin{aligned} \kappa_{6b}(\xi) &= -28.6k_{18} + 6.1k_{73} + 0.02k_1 - 9.6k_{25} - 10.2k_{72} - 1.9k_{76} + 20.3k_{37} - 13.1k_{38} - 9.1k_2 \\ & + 197.9 \end{aligned}$$


---

**Table S4.** Validation criteria of PLS-VIP regressions with step size  $0.03 \text{ amu}^{1/2}$  in system 3 and 6.

| Path      | $\sigma^2 k_i$ | $\sigma^2$<br>$\kappa_Y(\xi); Y = a, b$ | RSS                    | $R^2$ | $\# \kappa_Y(\xi)$<br>$Y = a, b$ | $k_i$ | Factors |
|-----------|----------------|-----------------------------------------|------------------------|-------|----------------------------------|-------|---------|
| <b>3a</b> | 95.7%          | 98.5%                                   | 0.035                  | 0.985 | 31                               | 99    | 7       |
| <b>6a</b> | 98.9%          | 99.9%                                   | $< 1.4 \times 10^{-7}$ | 0.999 | 27                               | 111   | 13      |
| <b>3b</b> | 93.9%          | 99.6%                                   | $< 0.0008$             | 0.999 | 48                               | 99    | 7       |
| <b>6b</b> | 99.9%          | 99.9%                                   | $< 1.5 \times 10^{-5}$ | 0.999 | 27                               | 111   | 15      |

**(a) Path-3a:** The PLS-VIP model with  $0.03 \text{ amu}^{1/2}$  step size shows a slight increase in the representativeness of Y ( $\Delta\sigma^2\kappa_Y(\xi) = 1.8\%$ ) due to the higher number of transients. However, it shows a loss in the representativeness of X ( $\Delta\sigma^2k_i = -3.6\%$ ) and a decrease in regression linearity ( $R^2 = 0.985$ ). Most notably, there is a significant decrease in the accuracy of the regression, with the RSS error increasing by 2.7 times.

**(b) Path-6a:** The predictive error (RSS) and linearity ( $R^2$ ) of the model do not differ significantly for either step size ( $0.07 \text{ amu}^{1/2}$ ,  $0.03 \text{ amu}^{1/2}$ ) despite the increase of the number of transients  $\kappa_Y(\xi)$ . Additionally, a marginal loss in the representativeness of X is found ( $\Delta\sigma^2k_i = -1\%$ ), for the smaller step size.

**(c) Path-3b:** The number of transients  $\kappa_Y(\xi)$ , predictive error (RSS), and linearity ( $R^2$ ) of the model do not differ significantly for either step size. However, there is a decrease in representativeness of X and Y ( $\Delta\sigma^2k_i = -2.8\%$ ,  $\Delta\sigma^2\kappa_Y(\xi) = -0.3\%$ ), which reduces the quality of the PLS-VIP model. This indicates that adjusting the step size to  $0.03 \text{ amu}^{1/2}$  does not provide significant information to enrich the chemical space of the regressions.

**(d) Path-6b:** Only a marginal gain in the representativeness of X and Y is observed ( $\Delta\sigma^2k_i = 1\%$ ,  $\Delta\sigma^2\kappa_Y(\xi) = 1.9\%$ ), while the other validation criteria are not significantly different.

This indicates that the step size of  $0.07 \text{ amu}^{1/2}$  is already sufficiently representative in describing the associated changes in the transition region.

In general, it can be concluded that, although there are slight increases in the X,Y representativeness of the PLS-VIP models by tightening the step size to  $0.03 \text{ amu}^{1/2}$ , these changes do not always lead to significant improvements in the overall quality of the regression model. Therefore, it is considered that a step size of  $0.07 \text{ amu}^{1/2}$  is able to satisfactorily describe both variables in the regression models under good statistical quality criteria.

**Substructure vibration characterization.** The vibrational contributions of the active modes (Table 6 and 7) are associated with direct (+) and inverse (-) relationship to  $\kappa(\xi)$ . These contributions were analyzed based on the vibrational characteristics of the five substructures (Scheme 3) relevant to the cyclization pathways (Path-3a/3b or Path-6a/6b). Each vibrational feature of these substructures was classified according to various infrared spectroscopic assignments<sup>58</sup>:

### Bz<sub>1</sub> substructure:

**Table S5.** Vibrational character of Bz<sub>1</sub> substructure.

|                                        |                                         |                                                                       |
|----------------------------------------|-----------------------------------------|-----------------------------------------------------------------------|
| $\nu_{e_{2u}(I)}: 411 \text{ cm}^{-1}$ | $\nu_{e_{2u}(II)}: 411 \text{ cm}^{-1}$ | <b>Description</b>                                                    |
|                                        |                                         | Double degenerate, <i>twisting</i> mode of the carbon backbone.       |
| $\nu_{e_{2g}(I)}: 616 \text{ cm}^{-1}$ | $\nu_{e_{2g}(II)}: 616 \text{ cm}^{-1}$ | <b>Description</b>                                                    |
|                                        |                                         | Double degenerate, Symmetric <i>stretching</i> of the carbon backbone |
| $\nu_{a_{2u}}: 690 \text{ cm}^{-1}$    |                                         | <b>Description</b>                                                    |

|                                                                                   |                                                          |
|-----------------------------------------------------------------------------------|----------------------------------------------------------|
| 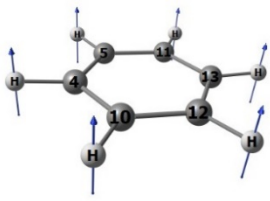 | <p><i>H-wagging</i> in all hydrogen.</p>                 |
| $\nu_{b_{2g}}:718 \text{ cm}^{-1}$                                                | <b>Description</b>                                       |
|  | <p><i>H-twisting</i> and C-twisting in all the atoms</p> |

|                                                                                     |                                                                                      |                                                                                                                                                          |
|-------------------------------------------------------------------------------------|--------------------------------------------------------------------------------------|----------------------------------------------------------------------------------------------------------------------------------------------------------|
| $\nu_{e_{1g}(I)}:877 \text{ cm}^{-1}$                                               | $\nu_{e_{1g}(II)}:877 \text{ cm}^{-1}$                                               | <b>Description</b>                                                                                                                                       |
| 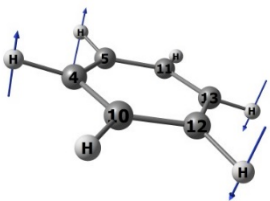   |     | <p>Double degenerate, <i>H-twisting</i> mode for H-bonded to C<sub>4</sub>-C<sub>5</sub>, C<sub>12</sub>-C<sub>13</sub> (I) and for all H-atoms (II)</p> |
| $\nu_{e_{2g}(I)}:1003 \text{ cm}^{-1}$                                              | $\nu_{e_{2g}(II)}:1003 \text{ cm}^{-1}$                                              | <b>Description</b>                                                                                                                                       |
|  |   | <p>Double degenerate, <i>H-twisting</i> mode for H-bonded to C<sub>4</sub>-C<sub>5</sub>, C<sub>12</sub>-C<sub>13</sub> (I) and for all H-atoms (II)</p> |
| $\nu_{b_{2g}(I)}:1034 \text{ cm}^{-1}$                                              |                                                                                      | <b>Description</b>                                                                                                                                       |
|  |                                                                                      | <p><i>H-twisting</i> mode for all H-atoms</p>                                                                                                            |
| $\nu_{e_{1u}(I)}:1077 \text{ cm}^{-1}$                                              | $\nu_{e_{1u}(II)}:1077 \text{ cm}^{-1}$                                              | <b>Description</b>                                                                                                                                       |
|  |  | <p>Double degenerate, <i>H-scissoring</i> mode for all the H-atoms (I) and <i>H-scissoring</i> mode in four H-atoms.</p>                                 |
| $\nu_{b_{2u}}:1175 \text{ cm}^{-1}$                                                 |                                                                                      | <b>Description</b>                                                                                                                                       |



|                                                                                     |                                                                                    |                                                                  |
|-------------------------------------------------------------------------------------|------------------------------------------------------------------------------------|------------------------------------------------------------------|
| 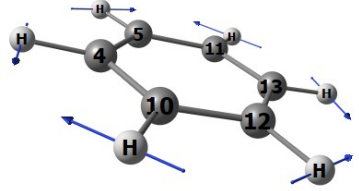   |                                                                                    | H-scissoring mode for all the H-atoms                            |
| $\nu_{e_{2g(I)}}:1206 \text{ cm}^{-1}$                                              | $\nu_{e_{2g(II)}}:1206 \text{ cm}^{-1}$                                            | <b>Description</b>                                               |
|    |  | Double degenerate, <i>H-scissoring</i> mode for all the H-atoms. |
| $\nu_{b_{2u}}:1360 \text{ cm}^{-1}$                                                 |                                                                                    | <b>Description</b>                                               |
|    |                                                                                    | Symmetric <i>stretching</i> in the carbon backbone               |
| $\nu_{a_{2g}}:1379 \text{ cm}^{-1}$                                                 |                                                                                    | <b>Description</b>                                               |
|   |                                                                                    | <i>H-rocking</i> mode in all the H-atoms                         |
| $\nu_{a_{1g}}:3231 \text{ cm}^{-1}$                                                 |                                                                                    | <b>Description</b>                                               |
|  |                                                                                    | symmetric <i>stretching</i> in all H-atoms.                      |

### B<sub>Z</sub><sub>2</sub> substructure:

**Table S6.** Vibrational character of B<sub>Z</sub><sub>2</sub> substructure.

|                                        |                                         |                    |
|----------------------------------------|-----------------------------------------|--------------------|
| $\nu_{e_{2u(I)}}: 411 \text{ cm}^{-1}$ | $\nu_{e_{2u(II)}}: 411 \text{ cm}^{-1}$ | <b>Description</b> |
|----------------------------------------|-----------------------------------------|--------------------|

|                                                                                   |                                                                                    |                                                                                |
|-----------------------------------------------------------------------------------|------------------------------------------------------------------------------------|--------------------------------------------------------------------------------|
| 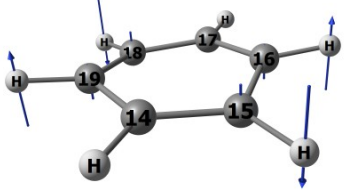 |  | Double degenerate, <i>twisting</i> mode of the carbon backbone.                |
| $\nu_{e2g(I)}:616 \text{ cm}^{-1}$                                                | $\nu_{e2g(II)}:616 \text{ cm}^{-1}$                                                | <b>Description</b>                                                             |
|  |  | Double degenerate, Symmetric <i>stretching</i> of the carbon-hydrogen backbone |
| $\nu_{a2u}:690 \text{ cm}^{-1}$                                                   |                                                                                    | <b>Description</b>                                                             |
|  |                                                                                    | <i>H-wagging</i> for all hydrogen atoms                                        |

|                                                                                     |                                                                                      |                                                                                                                   |
|-------------------------------------------------------------------------------------|--------------------------------------------------------------------------------------|-------------------------------------------------------------------------------------------------------------------|
| $\nu_{e1g(I)}:877 \text{ cm}^{-1}$                                                  | $\nu_{e1g(II)}:877 \text{ cm}^{-1}$                                                  | <b>Description</b>                                                                                                |
| 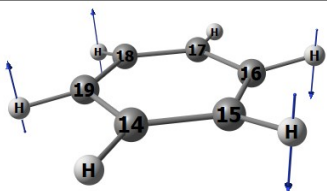 |  | Double degenerate, <i>H-twisting</i> in four H-atoms (I) and <i>H-twisting</i> for all H-atoms (II)               |
| $\nu_{e2g(I)}:1003 \text{ cm}^{-1}$                                                 | $\nu_{e2g(II)}:1003 \text{ cm}^{-1}$                                                 | <b>Description</b>                                                                                                |
|  |  | Double degenerate, <i>H-twisting</i> in four H-atoms (I) and <i>H-twisting</i> for all H-atoms (II)               |
| $\nu_{e1u(I)}:1077 \text{ cm}^{-1}$                                                 | $\nu_{e1u(II)}:1077 \text{ cm}^{-1}$                                                 | <b>Description</b>                                                                                                |
|  |  | Double degenerate, <i>H-scissoring</i> mode for all the H-atoms (I) and <i>H-scissoring</i> mode in four H-atoms. |
| $\nu_{e2g(I)}:1206 \text{ cm}^{-1}$                                                 | $\nu_{e2g(II)}:1206 \text{ cm}^{-1}$                                                 | <b>Description</b>                                                                                                |

|                                    |  |                                                                  |
|------------------------------------|--|------------------------------------------------------------------|
|                                    |  | Double degenerate, <i>H-scissoring</i> mode for all the H-atoms. |
| $\nu_{b_{2u}}:1360\text{ cm}^{-1}$ |  | <b>Description</b>                                               |
|                                    |  | Symmetric <i>stretching</i> in the carbon backbone               |
| $\nu_{a_{2g}}:1379\text{ cm}^{-1}$ |  | <b>Description</b>                                               |
|                                    |  | <i>H-rocking</i> mode in all the H-atoms                         |

|                                       |                                        |                                                 |
|---------------------------------------|----------------------------------------|-------------------------------------------------|
| $\nu_{e_{2g}(I)}:3208\text{ cm}^{-1}$ | $\nu_{e_{2g}(II)}:3208\text{ cm}^{-1}$ | <b>Description</b>                              |
|                                       |                                        | Symmetric stretching among all the H atoms      |
| $\nu_{e_{1u}(I)}:3222\text{ cm}^{-1}$ | $\nu_{e_{1u}(II)}:3222\text{ cm}^{-1}$ | <b>Description</b>                              |
|                                       |                                        | Anti-symmetric stretching among all the H atoms |

**B<sub>3</sub> substructure:**

**Table S7.** Vibrational character of Bz<sub>3</sub> substructure.

|                                                                                    |                                                                                    |                                                                       |
|------------------------------------------------------------------------------------|------------------------------------------------------------------------------------|-----------------------------------------------------------------------|
| $\nu_{e_{2u}(I)}: 411 \text{ cm}^{-1}$                                             | $\nu_{e_{2u}(II)}: 411 \text{ cm}^{-1}$                                            | <b>Description</b>                                                    |
| 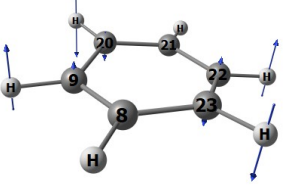  |  | Double degenerate, <i>twisting</i> mode of the carbon backbone.       |
| $\nu_{e_{2g}(I)}: 616 \text{ cm}^{-1}$                                             | $\nu_{e_{2g}(II)}: 616 \text{ cm}^{-1}$                                            | <b>Description</b>                                                    |
|   |   | Double degenerate, symmetric <i>stretching</i> of the carbon backbone |
| $\nu_{a_{2u}}: 690 \text{ cm}^{-1}$                                                |                                                                                    | <b>Description</b>                                                    |
|  |                                                                                    | <i>H-wagging</i> for all hydrogen atoms                               |

|                                                                                     |                                                                                      |                                                                                                                   |
|-------------------------------------------------------------------------------------|--------------------------------------------------------------------------------------|-------------------------------------------------------------------------------------------------------------------|
| $\nu_{e_{2g}(I)}: 1003 \text{ cm}^{-1}$                                             | $\nu_{e_{2g}(II)}: 1003 \text{ cm}^{-1}$                                             | <b>Description</b>                                                                                                |
| 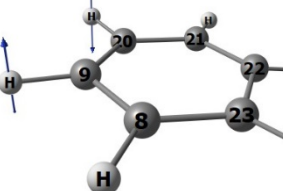 |  | Double degenerate, <i>H-twisting</i> in four H-atoms (I) and <i>H-twisting</i> for all H-atoms (II)               |
| $\nu_{e_{1u}(I)}: 1077 \text{ cm}^{-1}$                                             | $\nu_{e_{1u}(II)}: 1077 \text{ cm}^{-1}$                                             | <b>Description</b>                                                                                                |
|  |  | Double degenerate, <i>H-scissoring</i> mode for all the H-atoms (I) and <i>H-scissoring</i> mode in four H-atoms. |
| $\nu_{e_{2g}(I)}: 1206 \text{ cm}^{-1}$                                             | $\nu_{e_{2g}(II)}: 1206 \text{ cm}^{-1}$                                             | <b>Description</b>                                                                                                |

|                                     |                                                                  |
|-------------------------------------|------------------------------------------------------------------|
|                                     | Double degenerate, <i>H-scissoring</i> mode for all the H-atoms. |
| $\nu_{b_{2u}}:1360 \text{ cm}^{-1}$ | <b>Description</b>                                               |
|                                     | Symmetric <i>stretching</i> in the carbon backbone               |
| $\nu_{a_{2g}}:1379 \text{ cm}^{-1}$ | <b>Description</b>                                               |
|                                     | <i>H-rocking</i> mode in all the H-atoms                         |

|                                     |                                            |
|-------------------------------------|--------------------------------------------|
| $\nu_{a_{1g}}:3231 \text{ cm}^{-1}$ | <b>Description</b>                         |
|                                     | Symmetric <i>stretching</i> in all H-atoms |

**Al substructure:**

**Table S8.** Vibrational character of Al substructure.

|                             |                             |                    |
|-----------------------------|-----------------------------|--------------------|
| $\nu_a:379 \text{ cm}^{-1}$ | $\nu_b:379 \text{ cm}^{-1}$ | <b>Description</b> |
|-----------------------------|-----------------------------|--------------------|

|                               |                               |                                                                                             |
|-------------------------------|-------------------------------|---------------------------------------------------------------------------------------------|
|                               |                               | Antisymmetric <i>bending</i> type of the three-atom group                                   |
| $\nu_a: 896 \text{ cm}^{-1}$  | $\nu_b: 896 \text{ cm}^{-1}$  | <b>Description</b>                                                                          |
|                               |                               | wagging mode for the four H-atoms                                                           |
| $\nu_a: 1028 \text{ cm}^{-1}$ | $\nu_b: 1028 \text{ cm}^{-1}$ | <b>Description</b>                                                                          |
|                               |                               | <i>bending</i> mode of the carbon structure and antisymmetric <i>rocking</i> in the H-atoms |
| $\nu_b: 1442 \text{ cm}^{-1}$ |                               | <b>Description</b>                                                                          |
|                               |                               | <i>Scissoring</i> mode in the H-atoms.                                                      |

|                               |                                     |
|-------------------------------|-------------------------------------|
| $\nu_b: 3177 \text{ cm}^{-1}$ | <b>Description</b>                  |
|                               | C-H antisymmetric <i>stretching</i> |

### Ac substructure:

**Table S9.** Vibrational character of Ac substructure.

|                                       |                                        |                    |
|---------------------------------------|----------------------------------------|--------------------|
| $\nu_{\pi_g(I)}: 671 \text{ cm}^{-1}$ | $\nu_{\pi_g(II)}: 671 \text{ cm}^{-1}$ | <b>Description</b> |
|---------------------------------------|----------------------------------------|--------------------|

|                                                                                   |                                                                                    |                                             |
|-----------------------------------------------------------------------------------|------------------------------------------------------------------------------------|---------------------------------------------|
| 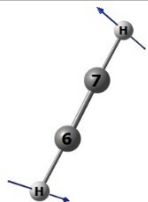 |  | Double degenerated, <i>c</i> -twisting mode |
| $\nu_{\pi_u(I)}:799 \text{ cm}^{-1}$                                              | $\nu_{\pi_u(II)}:799 \text{ cm}^{-1}$                                              | <b>Description</b>                          |
|  |  | <i>H</i> -wagging mode                      |

**Et substructure:**

**Table S10.** Vibrational character of Et substructure

|                                                                                     |                                                                                      |                                           |
|-------------------------------------------------------------------------------------|--------------------------------------------------------------------------------------|-------------------------------------------|
| $\nu_{a_{1u}}:299 \text{ cm}^{-1}$                                                  | 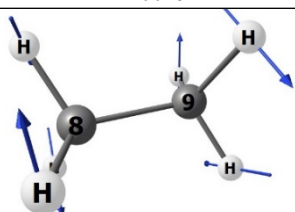  | <b>Description</b>                        |
|                                                                                     |                                                                                      | <i>rocking</i> mode for all H-atoms       |
| $\nu_{eu(I)}:819 \text{ cm}^{-1}$                                                   | $\nu_{eu(II)}:819 \text{ cm}^{-1}$                                                   | <b>Description</b>                        |
|  |  | <i>scissoring</i> mode in the H-atoms     |
| $\nu_{a_{1g}}:1030 \text{ cm}^{-1}$                                                 |                                                                                      | <b>Description</b>                        |
|  |                                                                                      | <i>stretching</i> mode on the two C-atoms |

| $\nu_{e g(I)}:1225 \text{ cm}^{-1}$                                               | $\nu_{e g(II)}:1225 \text{ cm}^{-1}$                                               | <b>Description</b>                                                                |
|-----------------------------------------------------------------------------------|------------------------------------------------------------------------------------|-----------------------------------------------------------------------------------|
| 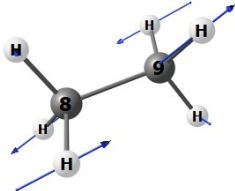 |  | <i>twisting</i> mode on the two C-atoms and <i>scissoring</i> mode in the H-atoms |
| $\nu_{a 2u}:1417 \text{ cm}^{-1}$                                                 |                                                                                    | <b>Description</b>                                                                |
|  |                                                                                    | <i>scissoring</i> mode on the H-atoms                                             |



## Cartesian coordinates of Transition States:

### TS1a:

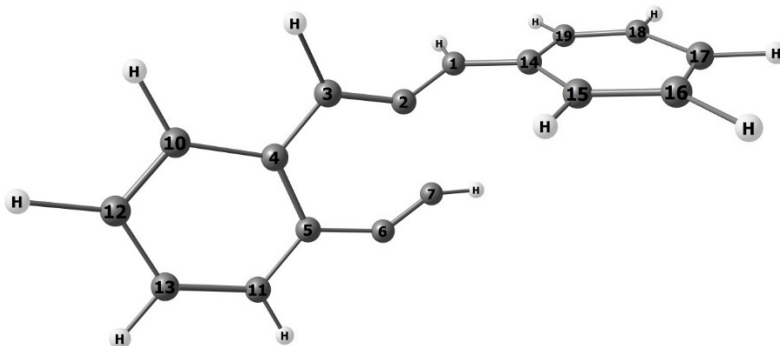

### 0 1

|   |                 |                 |                 |
|---|-----------------|-----------------|-----------------|
| C | 0.146521000000  | 0.261236000000  | 0.119750000000  |
| C | 0.268477000000  | 0.341566000000  | 1.369331000000  |
| C | 2.113363000000  | 0.180088000000  | 1.766874000000  |
| C | 2.847716000000  | 0.074290000000  | 0.638501000000  |
| C | 2.361856000000  | -0.054050000000 | -0.714911000000 |
| C | 0.981186000000  | 0.102615000000  | -1.014214000000 |
| H | -0.259240000000 | 0.370115000000  | 2.307631000000  |
| C | 3.262094000000  | -0.216723000000 | -1.786890000000 |
| C | 2.815949000000  | -0.210892000000 | -3.095898000000 |
| C | 1.454448000000  | -0.016042000000 | -3.381657000000 |
| C | 0.547819000000  | 0.151489000000  | -2.350120000000 |
| H | -0.508907000000 | 0.298221000000  | -2.551286000000 |
| H | 1.113471000000  | 0.000434000000  | -4.412354000000 |
| H | 3.524458000000  | -0.348613000000 | -3.907386000000 |
| H | 4.318874000000  | -0.356400000000 | -1.571573000000 |
| C | 2.231183000000  | 0.024071000000  | 3.110768000000  |
| H | 2.615228000000  | -0.931410000000 | 3.470487000000  |

|   |                |                 |                |
|---|----------------|-----------------|----------------|
| H | 3.924755000000 | 0.188813000000  | 0.752943000000 |
| C | 1.702456000000 | 0.928775000000  | 4.117941000000 |
| C | 1.683523000000 | 0.529785000000  | 5.467307000000 |
| C | 1.205524000000 | 2.205095000000  | 3.792947000000 |
| C | 1.193371000000 | 1.374020000000  | 6.455889000000 |
| H | 2.061700000000 | -0.455082000000 | 5.732166000000 |
| C | 0.712829000000 | 3.046507000000  | 4.784600000000 |
| H | 1.223163000000 | 2.536170000000  | 2.757674000000 |
| C | 0.703313000000 | 2.636760000000  | 6.118492000000 |
| H | 1.189356000000 | 1.047291000000  | 7.491831000000 |
| H | 0.336994000000 | 4.029598000000  | 4.515575000000 |
| H | 0.317571000000 | 3.297279000000  | 6.889357000000 |

**TS1b:**

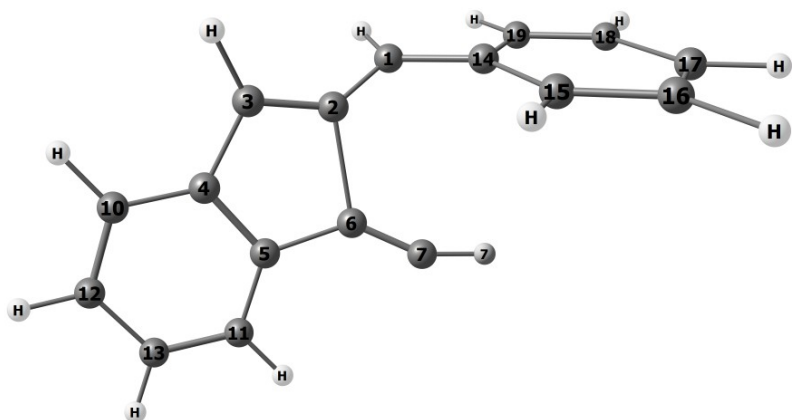

**0 1**

|   |                 |                 |                 |
|---|-----------------|-----------------|-----------------|
| C | 0.193012000000  | 0.043994000000  | 0.055539000000  |
| C | 0.131922000000  | 0.016183000000  | 1.316901000000  |
| C | 1.604468000000  | -0.024990000000 | 2.423698000000  |
| C | 1.042335000000  | -0.304348000000 | 3.619255000000  |
| C | -0.407741000000 | -0.218631000000 | 3.638977000000  |
| C | -0.915823000000 | -0.018846000000 | 2.344828000000  |
| H | 0.660485000000  | 0.126925000000  | -0.906564000000 |
| C | -2.285118000000 | 0.100655000000  | 2.128192000000  |
| C | -3.149370000000 | 0.008080000000  | 3.219029000000  |
| C | -2.647726000000 | -0.194089000000 | 4.509226000000  |
| C | -1.276734000000 | -0.312234000000 | 4.726852000000  |
| H | -2.664924000000 | 0.248362000000  | 1.121546000000  |
| H | -4.221451000000 | 0.084121000000  | 3.063247000000  |
| H | -3.334357000000 | -0.261469000000 | 5.348147000000  |
| H | -0.885613000000 | -0.461398000000 | 5.729809000000  |
| C | 2.811999000000  | 0.396323000000  | 1.928883000000  |
| H | 3.316967000000  | 1.198302000000  | 2.467451000000  |

|   |                |                 |                 |
|---|----------------|-----------------|-----------------|
| H | 1.621833000000 | -0.644506000000 | 4.473150000000  |
| C | 3.349550000000 | 0.036372000000  | 0.644992000000  |
| C | 4.348728000000 | 0.839650000000  | 0.050280000000  |
| C | 2.892004000000 | -1.091869000000 | -0.064835000000 |
| C | 4.853103000000 | 0.538047000000  | -1.203240000000 |
| H | 4.711685000000 | 1.711385000000  | 0.590107000000  |
| C | 3.406301000000 | -1.393503000000 | -1.325981000000 |
| H | 2.168549000000 | -1.754107000000 | 0.400300000000  |
| C | 4.378857000000 | -0.580802000000 | -1.900736000000 |
| H | 5.616178000000 | 1.171117000000  | -1.646819000000 |
| H | 3.050676000000 | -2.273598000000 | -1.854603000000 |
| H | 4.778248000000 | -0.818164000000 | -2.882562000000 |

TS2a:

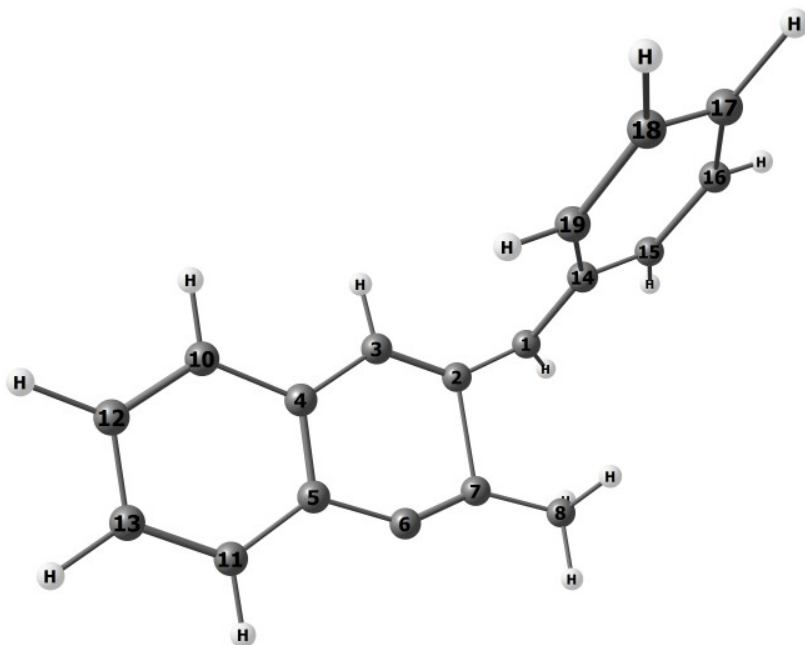

0 1

|   |                 |                 |                 |
|---|-----------------|-----------------|-----------------|
| C | -0.013204000000 | -0.121477000000 | 0.030189000000  |
| C | -0.017531000000 | -0.152813000000 | 1.295681000000  |
| C | 1.775619000000  | -0.038505000000 | 1.801041000000  |
| C | 2.611782000000  | 0.097063000000  | 0.746558000000  |
| C | 2.252884000000  | 0.165741000000  | -0.645128000000 |
| C | 0.902701000000  | -0.030851000000 | -1.040953000000 |
| C | 3.234637000000  | 0.297482000000  | -1.649085000000 |
| C | 2.893869000000  | 0.214454000000  | -2.985621000000 |
| C | 1.561491000000  | -0.027593000000 | -3.365910000000 |
| C | 0.577369000000  | -0.158201000000 | -2.404054000000 |
| H | -0.457437000000 | -0.335144000000 | -2.680897000000 |
| H | 1.305451000000  | -0.106603000000 | -4.418214000000 |
| H | 3.660114000000  | 0.327961000000  | -3.746793000000 |
| H | 4.268336000000  | 0.468762000000  | -1.357278000000 |

|   |                 |                 |                |
|---|-----------------|-----------------|----------------|
| C | 1.848719000000  | 0.059205000000  | 3.157370000000 |
| H | 1.471814000000  | -0.764890000000 | 3.763906000000 |
| H | 3.676419000000  | 0.049551000000  | 0.974158000000 |
| C | 2.246578000000  | 1.257246000000  | 3.884522000000 |
| C | 2.285183000000  | 1.225212000000  | 5.290834000000 |
| C | 2.607906000000  | 2.453050000000  | 3.235997000000 |
| C | 2.690882000000  | 2.336220000000  | 6.021098000000 |
| H | 2.001913000000  | 0.310509000000  | 5.806960000000 |
| C | 3.008248000000  | 3.563054000000  | 3.969884000000 |
| H | 2.559859000000  | 2.504682000000  | 2.151548000000 |
| C | 3.055055000000  | 3.512203000000  | 5.364628000000 |
| H | 2.719864000000  | 2.286538000000  | 7.105953000000 |
| H | 3.279606000000  | 4.478167000000  | 3.450997000000 |
| H | 3.365692000000  | 4.383100000000  | 5.934029000000 |
| C | -0.943698000000 | -0.092513000000 | 2.454609000000 |
| H | -0.847973000000 | -0.986608000000 | 3.079461000000 |
| H | -0.720076000000 | 0.779536000000  | 3.076695000000 |
| H | -1.971540000000 | -0.027583000000 | 2.090729000000 |

TS2b:

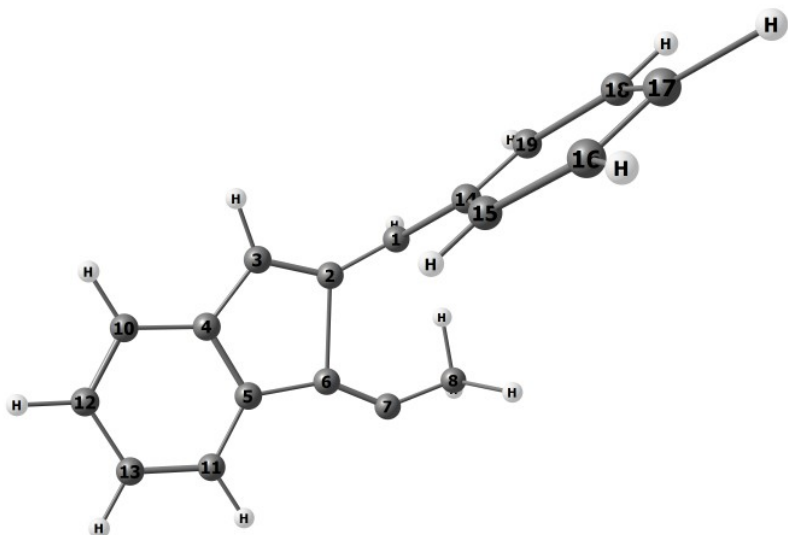

0 1

|   |                 |                 |                |
|---|-----------------|-----------------|----------------|
| C | 0.000000000000  | 0.000000000000  | 0.000000000000 |
| C | 0.000000000000  | 0.000000000000  | 1.262131000000 |
| C | 1.763790000000  | 0.000000000000  | 1.914606000000 |
| C | 1.501057000000  | 0.011719000000  | 3.226951000000 |
| C | 0.093849000000  | 0.038240000000  | 3.621043000000 |
| C | -0.750223000000 | 0.020425000000  | 2.499266000000 |
| C | -2.135442000000 | 0.034746000000  | 2.645290000000 |
| C | -2.673075000000 | 0.063223000000  | 3.931308000000 |
| C | -1.836284000000 | 0.079562000000  | 5.051578000000 |
| C | -0.449902000000 | 0.066991000000  | 4.903502000000 |
| H | -2.776190000000 | 0.022151000000  | 1.768809000000 |
| H | -3.750852000000 | 0.072215000000  | 4.063494000000 |
| H | -2.270855000000 | 0.102717000000  | 6.046782000000 |
| H | 0.199047000000  | 0.079901000000  | 5.775241000000 |
| C | 2.831310000000  | -0.076441000000 | 1.035233000000 |

|   |                |                 |                 |
|---|----------------|-----------------|-----------------|
| H | 3.400599000000 | 0.828599000000  | 0.822634000000  |
| H | 2.300639000000 | -0.023933000000 | 3.963059000000  |
| C | 3.451208000000 | -1.356930000000 | 0.662042000000  |
| C | 4.702946000000 | -1.375013000000 | 0.026750000000  |
| C | 2.808757000000 | -2.580637000000 | 0.909851000000  |
| C | 5.301501000000 | -2.577319000000 | -0.334186000000 |
| H | 5.208789000000 | -0.433499000000 | -0.176744000000 |
| C | 3.408877000000 | -3.781740000000 | 0.544417000000  |
| H | 1.834069000000 | -2.581294000000 | 1.392496000000  |
| C | 4.657235000000 | -3.788371000000 | -0.077960000000 |
| H | 6.274222000000 | -2.569831000000 | -0.818370000000 |
| H | 2.897459000000 | -4.719077000000 | 0.745288000000  |
| H | 5.123050000000 | -4.727133000000 | -0.362650000000 |
| C | 0.923712000000 | 0.040292000000  | -1.063989000000 |
| H | 1.927481000000 | 0.080688000000  | -0.417618000000 |
| H | 0.984694000000 | -0.861697000000 | -1.679085000000 |
| H | 0.899881000000 | 0.944870000000  | -1.676612000000 |



TS3a:

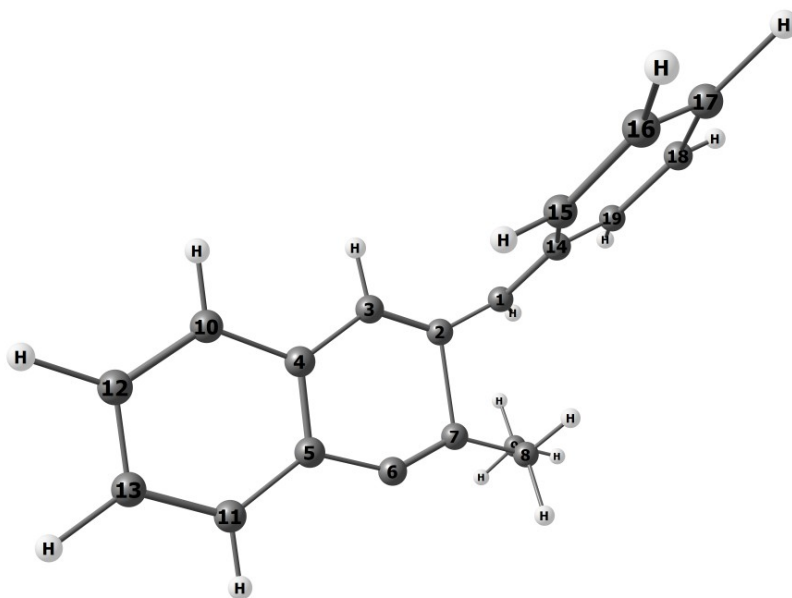

0 1

|   |                 |                 |                 |
|---|-----------------|-----------------|-----------------|
| C | 1.856206000000  | 1.322715000000  | 0.632638000000  |
| C | 0.677167000000  | 1.709444000000  | 0.382961000000  |
| C | -0.062873000000 | 0.370093000000  | -0.695342000000 |
| C | 0.789175000000  | -0.660196000000 | -0.904725000000 |
| C | 2.122331000000  | -0.811016000000 | -0.384974000000 |
| C | 2.724495000000  | 0.246272000000  | 0.348683000000  |
| C | 2.902369000000  | -1.945393000000 | -0.690712000000 |
| C | 4.227556000000  | -2.016747000000 | -0.305594000000 |
| C | 4.827253000000  | -0.943703000000 | 0.378138000000  |
| C | 4.086973000000  | 0.180287000000  | 0.693882000000  |
| H | 4.533135000000  | 1.011882000000  | 1.230698000000  |
| H | 5.873412000000  | -1.000922000000 | 0.663478000000  |
| H | 4.812060000000  | -2.901099000000 | -0.541423000000 |
| H | 2.443872000000  | -2.769156000000 | -1.233058000000 |
| C | -1.389396000000 | 0.609992000000  | -0.891462000000 |

|   |                 |                 |                 |
|---|-----------------|-----------------|-----------------|
| H | -1.694942000000 | 1.516420000000  | -1.413488000000 |
| H | 0.456836000000  | -1.413020000000 | -1.619287000000 |
| C | -2.465652000000 | -0.193517000000 | -0.325476000000 |
| C | -3.800060000000 | 0.135800000000  | -0.628793000000 |
| C | -2.227562000000 | -1.305114000000 | 0.504464000000  |
| C | -4.853987000000 | -0.630901000000 | -0.145844000000 |
| H | -4.001668000000 | 0.997265000000  | -1.261784000000 |
| C | -3.284168000000 | -2.066535000000 | 0.988681000000  |
| H | -1.205519000000 | -1.558023000000 | 0.773369000000  |
| C | -4.602262000000 | -1.738081000000 | 0.664948000000  |
| H | -5.875772000000 | -0.363524000000 | -0.400286000000 |
| H | -3.079184000000 | -2.919880000000 | 1.629167000000  |
| H | -5.424943000000 | -2.335769000000 | 1.046067000000  |
| C | -0.281903000000 | 2.790194000000  | 0.746537000000  |
| H | -1.273311000000 | 2.353142000000  | 0.905318000000  |
| H | 0.050627000000  | 3.217507000000  | 1.697869000000  |
| C | -0.339320000000 | 3.889741000000  | -0.319966000000 |
| H | -1.062792000000 | 4.660074000000  | -0.035679000000 |
| H | 0.642082000000  | 4.358263000000  | -0.434689000000 |
| H | -0.631952000000 | 3.486832000000  | -1.294532000000 |

**TS3b:**

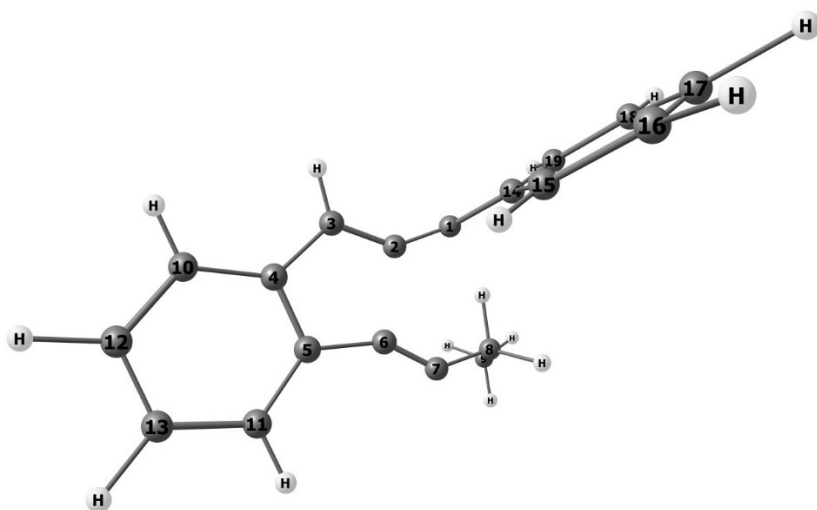

**0 1**

|   |                 |                 |                |
|---|-----------------|-----------------|----------------|
| C | 0.183184000000  | -0.289405000000 | 0.094063000000 |
| C | 0.031223000000  | -0.184266000000 | 1.340591000000 |
| C | 1.723515000000  | 0.137207000000  | 2.172042000000 |
| C | 1.307650000000  | 0.215672000000  | 3.440025000000 |
| C | -0.124246000000 | 0.057824000000  | 3.687715000000 |
| C | -0.834180000000 | -0.175932000000 | 2.498497000000 |
| C | -2.215604000000 | -0.358401000000 | 2.515232000000 |
| C | -2.884739000000 | -0.308557000000 | 3.737350000000 |
| C | -2.181489000000 | -0.078025000000 | 4.923663000000 |
| C | -0.799435000000 | 0.106223000000  | 4.905617000000 |
| H | -2.752426000000 | -0.536824000000 | 1.588462000000 |
| H | -3.960817000000 | -0.450686000000 | 3.767058000000 |
| H | -2.717135000000 | -0.042108000000 | 5.867734000000 |
| H | -0.253777000000 | 0.285555000000  | 5.828271000000 |
| C | 2.868103000000  | 0.146108000000  | 1.397609000000 |
| H | 3.307978000000  | 1.106149000000  | 1.125501000000 |

|   |                |                 |                 |
|---|----------------|-----------------|-----------------|
| H | 2.010960000000 | 0.371368000000  | 4.254799000000  |
| C | 3.718312000000 | -1.044560000000 | 1.235292000000  |
| C | 5.021402000000 | -0.914938000000 | 0.729966000000  |
| C | 3.250828000000 | -2.328041000000 | 1.559951000000  |
| C | 5.837839000000 | -2.029832000000 | 0.569462000000  |
| H | 5.394206000000 | 0.073391000000  | 0.469684000000  |
| C | 4.068813000000 | -3.441727000000 | 1.395009000000  |
| H | 2.239655000000 | -2.444558000000 | 1.942773000000  |
| C | 5.365895000000 | -3.300332000000 | 0.900869000000  |
| H | 6.846410000000 | -1.906882000000 | 0.184758000000  |
| H | 3.690229000000 | -4.427014000000 | 1.652273000000  |
| H | 6.001843000000 | -4.171164000000 | 0.773484000000  |
| C | 1.201697000000 | -0.191533000000 | -0.879655000000 |
| H | 2.100884000000 | -0.005683000000 | -0.110730000000 |
| H | 1.445563000000 | -1.140663000000 | -1.369792000000 |
| C | 1.156041000000 | 0.987494000000  | -1.849044000000 |
| H | 0.973259000000 | 1.919641000000  | -1.307201000000 |
| H | 2.107408000000 | 1.071730000000  | -2.381579000000 |
| H | 0.360294000000 | 0.856655000000  | -2.587123000000 |

TS4a:

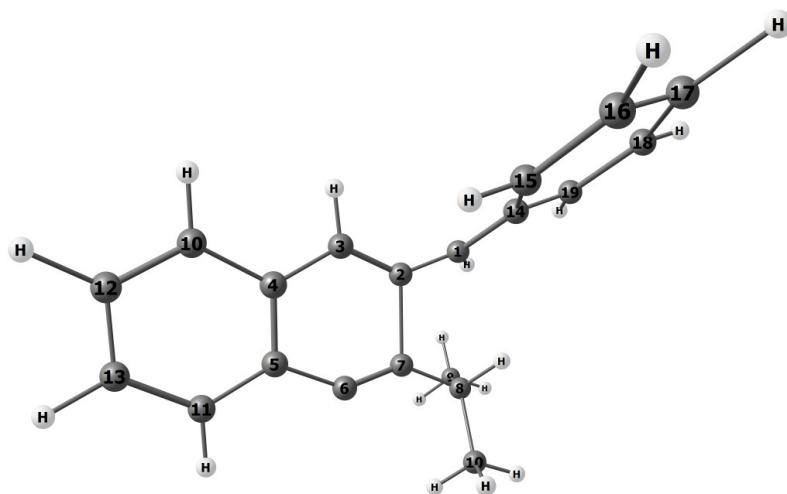

0 1

|   |                 |                 |                 |
|---|-----------------|-----------------|-----------------|
| C | -0.036167000000 | -0.037256000000 | 0.047051000000  |
| C | -0.043571000000 | -0.085482000000 | 1.313284000000  |
| C | 1.745863000000  | -0.030441000000 | 1.822366000000  |
| C | 2.587063000000  | 0.083911000000  | 0.767650000000  |
| C | 2.235345000000  | 0.171900000000  | -0.624390000000 |
| C | 0.879815000000  | 0.031389000000  | -1.024815000000 |
| C | 3.223816000000  | 0.276616000000  | -1.625034000000 |
| C | 2.883257000000  | 0.220019000000  | -2.962972000000 |
| C | 1.543274000000  | 0.033418000000  | -3.347931000000 |
| C | 0.552435000000  | -0.069134000000 | -2.389625000000 |
| H | -0.487772000000 | -0.202561000000 | -2.670630000000 |
| H | 1.286652000000  | -0.024096000000 | -4.401502000000 |
| H | 3.654788000000  | 0.312425000000  | -3.721690000000 |
| H | 4.262447000000  | 0.405812000000  | -1.328986000000 |
| C | 1.850995000000  | 0.082984000000  | 3.177119000000  |
| H | 1.468565000000  | -0.718383000000 | 3.808763000000  |

|   |                 |                 |                |
|---|-----------------|-----------------|----------------|
| H | 3.649806000000  | 0.010026000000  | 0.997196000000 |
| C | 2.296027000000  | 1.282129000000  | 3.873873000000 |
| C | 2.372535000000  | 1.269285000000  | 5.279395000000 |
| C | 2.667005000000  | 2.460417000000  | 3.198755000000 |
| C | 2.825697000000  | 2.379518000000  | 5.981952000000 |
| H | 2.081250000000  | 0.369109000000  | 5.816228000000 |
| C | 3.115778000000  | 3.569629000000  | 3.905194000000 |
| H | 2.587827000000  | 2.499839000000  | 2.115717000000 |
| C | 3.200898000000  | 3.536779000000  | 5.298624000000 |
| H | 2.883506000000  | 2.344204000000  | 7.066242000000 |
| H | 3.394345000000  | 4.470637000000  | 3.365867000000 |
| H | 3.549096000000  | 4.407347000000  | 5.846547000000 |
| C | -1.014248000000 | -0.071482000000 | 2.451415000000 |
| H | -0.580700000000 | 0.544486000000  | 3.248551000000 |
| C | -1.227436000000 | -1.496670000000 | 2.980931000000 |
| H | -1.888765000000 | -1.481408000000 | 3.853809000000 |
| H | -1.690376000000 | -2.115097000000 | 2.204605000000 |
| H | -0.285421000000 | -1.972734000000 | 3.269620000000 |
| C | -2.346724000000 | 0.549056000000  | 2.020245000000 |
| H | -2.819737000000 | -0.054354000000 | 1.239558000000 |
| H | -3.025544000000 | 0.598718000000  | 2.878456000000 |
| H | -2.201010000000 | 1.559804000000  | 1.629330000000 |

TS4b:

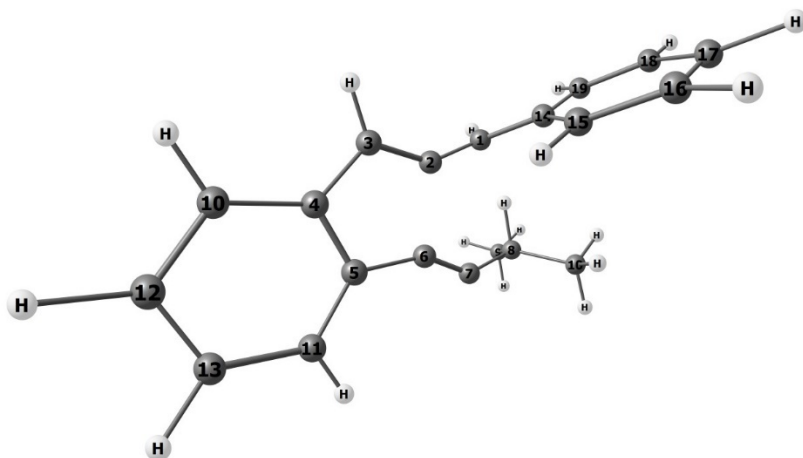

0 1

|   |                 |                 |                |
|---|-----------------|-----------------|----------------|
| C | 0.114248000000  | -0.230339000000 | 0.072150000000 |
| C | -0.019183000000 | -0.141014000000 | 1.321083000000 |
| C | 1.711466000000  | 0.153102000000  | 2.138890000000 |
| C | 1.309641000000  | 0.229449000000  | 3.410152000000 |
| C | -0.122103000000 | 0.095870000000  | 3.675366000000 |
| C | -0.857033000000 | -0.123565000000 | 2.498404000000 |
| C | -2.240590000000 | -0.287838000000 | 2.542480000000 |
| C | -2.885682000000 | -0.235303000000 | 3.777056000000 |
| C | -2.157270000000 | -0.017672000000 | 4.950306000000 |
| C | -0.773767000000 | 0.148897000000  | 4.905656000000 |
| H | -2.796606000000 | -0.456846000000 | 1.625156000000 |
| H | -3.962753000000 | -0.364893000000 | 3.826659000000 |
| H | -2.674267000000 | 0.022003000000  | 5.904744000000 |
| H | -0.208590000000 | 0.318439000000  | 5.818531000000 |
| C | 2.829288000000  | 0.140558000000  | 1.330665000000 |
| H | 3.296901000000  | 1.088316000000  | 1.061755000000 |

|   |                |                 |                 |
|---|----------------|-----------------|-----------------|
| H | 2.024801000000 | 0.358675000000  | 4.219640000000  |
| C | 3.618027000000 | -1.082566000000 | 1.099755000000  |
| C | 4.862341000000 | -1.009024000000 | 0.454603000000  |
| C | 3.141820000000 | -2.343705000000 | 1.490995000000  |
| C | 5.611454000000 | -2.156903000000 | 0.217365000000  |
| H | 5.241624000000 | -0.038668000000 | 0.140524000000  |
| C | 3.892063000000 | -3.490636000000 | 1.250337000000  |
| H | 2.174989000000 | -2.417495000000 | 1.983766000000  |
| C | 5.129667000000 | -3.405516000000 | 0.612210000000  |
| H | 6.575493000000 | -2.076720000000 | -0.277490000000 |
| H | 3.506958000000 | -4.457576000000 | 1.562344000000  |
| H | 5.712640000000 | -4.302167000000 | 0.423918000000  |
| C | 1.119368000000 | -0.135835000000 | -0.922104000000 |
| H | 2.008315000000 | 0.059401000000  | -0.142880000000 |
| C | 1.058631000000 | 1.097379000000  | -1.823532000000 |
| H | 2.013873000000 | 1.221025000000  | -2.344125000000 |
| H | 0.272424000000 | 0.984068000000  | -2.576864000000 |
| H | 0.854101000000 | 2.000366000000  | -1.241858000000 |
| C | 1.476872000000 | -1.418915000000 | -1.670309000000 |
| H | 0.732741000000 | -1.629695000000 | -2.445488000000 |
| H | 2.453499000000 | -1.303808000000 | -2.152115000000 |
| H | 1.528561000000 | -2.272425000000 | -0.989233000000 |



TS5a:

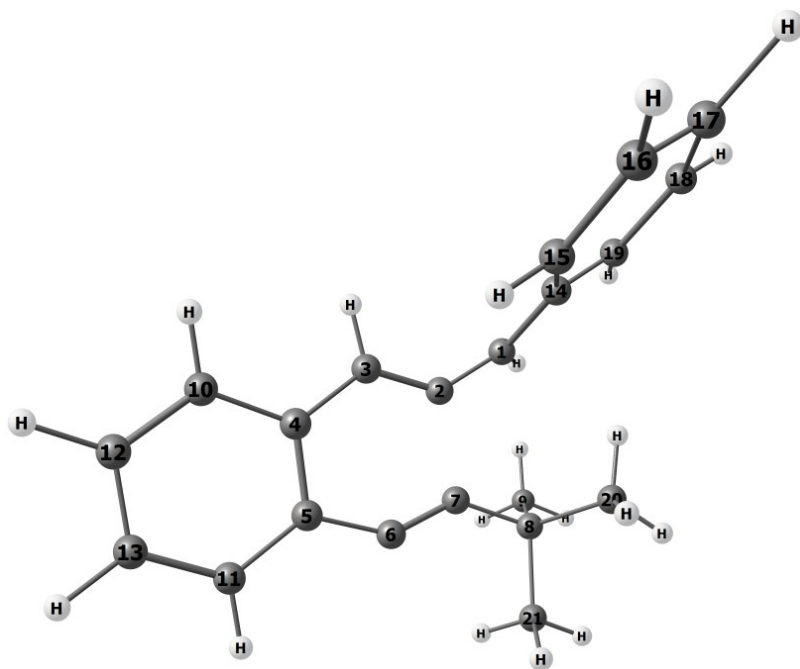

0 1

|   |                 |                 |                 |
|---|-----------------|-----------------|-----------------|
| C | 0.026630000000  | -0.046781000000 | 0.048540000000  |
| C | 0.048208000000  | -0.059757000000 | 1.315645000000  |
| C | 1.897180000000  | -0.034273000000 | 1.734160000000  |
| C | 2.676655000000  | 0.037724000000  | 0.627424000000  |
| C | 2.259837000000  | 0.108680000000  | -0.745299000000 |
| C | 0.884863000000  | -0.024433000000 | -1.070330000000 |
| C | 3.197057000000  | 0.171940000000  | -1.797374000000 |
| C | 2.786407000000  | 0.079371000000  | -3.113358000000 |
| C | 1.426440000000  | -0.105887000000 | -3.422868000000 |
| C | 0.485624000000  | -0.167906000000 | -2.412008000000 |
| H | -0.569091000000 | -0.298521000000 | -2.634320000000 |
| H | 1.114959000000  | -0.193572000000 | -4.459421000000 |
| H | 3.518140000000  | 0.140440000000  | -3.913648000000 |

|   |                 |                 |                 |
|---|-----------------|-----------------|-----------------|
| H | 4.250895000000  | 0.297725000000  | -1.559383000000 |
| C | 2.141646000000  | 0.115394000000  | 3.065172000000  |
| H | 1.791774000000  | -0.638948000000 | 3.766691000000  |
| H | 3.747112000000  | -0.069710000000 | 0.802924000000  |
| C | 2.775977000000  | 1.287193000000  | 3.658495000000  |
| C | 3.049534000000  | 1.289986000000  | 5.038682000000  |
| C | 3.133331000000  | 2.422707000000  | 2.908086000000  |
| C | 3.682373000000  | 2.371331000000  | 5.641401000000  |
| H | 2.768968000000  | 0.424264000000  | 5.634894000000  |
| C | 3.762121000000  | 3.503581000000  | 3.514692000000  |
| H | 2.899105000000  | 2.454080000000  | 1.847517000000  |
| C | 4.044255000000  | 3.484390000000  | 4.882088000000  |
| H | 3.891948000000  | 2.347507000000  | 6.707115000000  |
| H | 4.027868000000  | 4.372181000000  | 2.918714000000  |
| H | 4.534264000000  | 4.331672000000  | 5.352337000000  |
| C | -0.957541000000 | 0.012457000000  | 2.441257000000  |
| C | -0.983040000000 | -1.312091000000 | 3.219913000000  |
| H | -1.742317000000 | -1.256799000000 | 4.008645000000  |
| H | -1.234759000000 | -2.143872000000 | 2.554311000000  |
| H | -0.023547000000 | -1.534197000000 | 3.692909000000  |
| C | -2.336657000000 | 0.206739000000  | 1.781075000000  |
| H | -2.551208000000 | -0.605369000000 | 1.080703000000  |
| H | -3.113264000000 | 0.221946000000  | 2.554738000000  |
| H | -2.370992000000 | 1.152016000000  | 1.230866000000  |
| C | -0.722427000000 | 1.198086000000  | 3.389585000000  |
| H | 0.137162000000  | 1.056716000000  | 4.046008000000  |
| H | -0.572617000000 | 2.125638000000  | 2.826605000000  |
| H | -1.608052000000 | 1.319559000000  | 4.023954000000  |

TS5b:

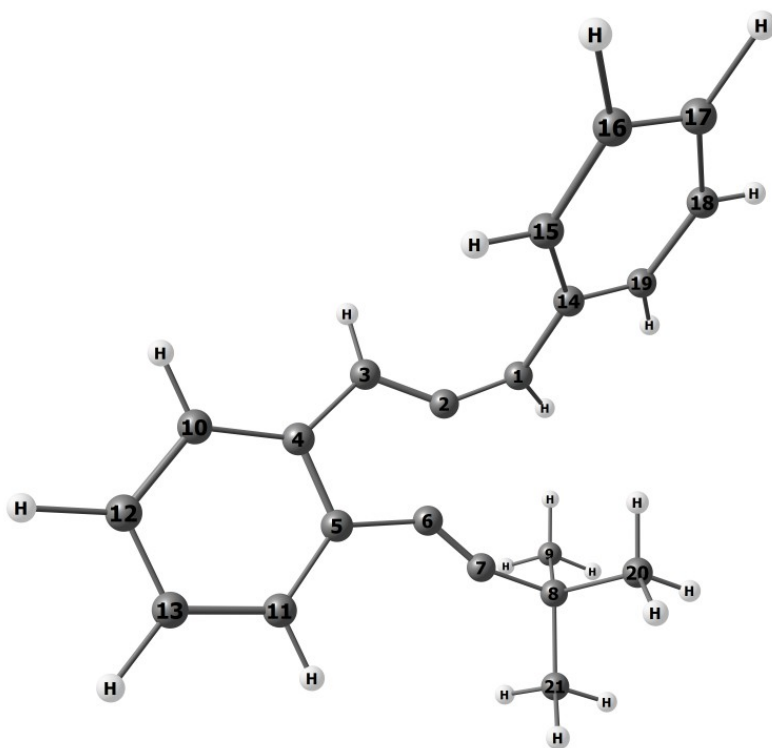

0 1

|   |                 |                 |                |
|---|-----------------|-----------------|----------------|
| C | 0.142768000000  | 0.056532000000  | 0.096623000000 |
| C | 0.015175000000  | 0.119229000000  | 1.348490000000 |
| C | 1.477940000000  | 0.448992000000  | 2.507305000000 |
| C | 0.830631000000  | 0.590401000000  | 3.685324000000 |
| C | -0.571096000000 | 0.218019000000  | 3.675607000000 |
| C | -1.023367000000 | -0.033745000000 | 2.368101000000 |
| C | -2.349092000000 | -0.389703000000 | 2.132836000000 |
| C | -3.227891000000 | -0.478679000000 | 3.211446000000 |
| C | -2.782810000000 | -0.224356000000 | 4.513241000000 |
| C | -1.456955000000 | 0.128080000000  | 4.751609000000 |
| H | -2.687382000000 | -0.577515000000 | 1.117721000000 |
| H | -4.268184000000 | -0.737363000000 | 3.037247000000 |

|   |                 |                 |                 |
|---|-----------------|-----------------|-----------------|
| H | -3.478658000000 | -0.299444000000 | 5.343915000000  |
| H | -1.109220000000 | 0.320745000000  | 5.763252000000  |
| C | 2.746163000000  | 0.400495000000  | 2.013597000000  |
| H | 2.935186000000  | 0.860517000000  | 1.044004000000  |
| H | 1.298016000000  | 1.084096000000  | 4.535109000000  |
| C | 3.869557000000  | -0.304785000000 | 2.608209000000  |
| C | 5.127056000000  | -0.229585000000 | 1.978846000000  |
| C | 3.763641000000  | -1.064310000000 | 3.789307000000  |
| C | 6.238604000000  | -0.867293000000 | 2.516808000000  |
| H | 5.223281000000  | 0.347335000000  | 1.061273000000  |
| C | 4.875409000000  | -1.705494000000 | 4.320183000000  |
| H | 2.796879000000  | -1.156998000000 | 4.275918000000  |
| C | 6.119705000000  | -1.608639000000 | 3.692408000000  |
| H | 7.200078000000  | -0.787722000000 | 2.017278000000  |
| H | 4.772775000000  | -2.289944000000 | 5.230414000000  |
| H | 6.985794000000  | -2.109934000000 | 4.114114000000  |
| C | 0.772421000000  | -0.017756000000 | -1.230924000000 |
| C | -0.288101000000 | -0.397419000000 | -2.282006000000 |
| H | 0.182528000000  | -0.470960000000 | -3.269637000000 |
| H | -0.744045000000 | -1.363470000000 | -2.043744000000 |
| H | -1.079549000000 | 0.357220000000  | -2.327185000000 |
| C | 1.878405000000  | -1.090479000000 | -1.212706000000 |
| H | 1.453443000000  | -2.076249000000 | -0.999609000000 |
| H | 2.371483000000  | -1.127759000000 | -2.191391000000 |
| H | 2.634398000000  | -0.877623000000 | -0.450924000000 |
| C | 1.364141000000  | 1.357885000000  | -1.591117000000 |
| H | 0.586042000000  | 2.127260000000  | -1.591221000000 |
| H | 2.140914000000  | 1.657537000000  | -0.881080000000 |

H 1.810085000000 1.311274000000 -2.591301000000

**TS6a:**

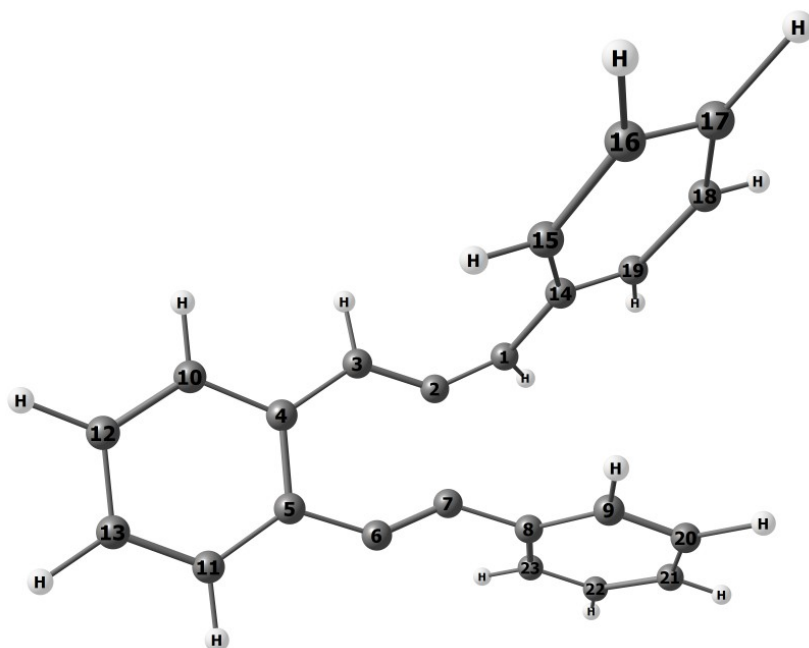

**0 1**

|   |                 |                 |                 |
|---|-----------------|-----------------|-----------------|
| C | -0.006038000000 | -0.028215000000 | -0.023810000000 |
| C | 0.049545000000  | 0.006697000000  | 1.240555000000  |
| C | 1.906716000000  | 0.039979000000  | 1.662032000000  |
| C | 2.676725000000  | 0.056539000000  | 0.552315000000  |
| C | 2.239223000000  | 0.101732000000  | -0.820610000000 |
| C | 0.860769000000  | -0.025838000000 | -1.140444000000 |
| C | 3.170759000000  | 0.134617000000  | -1.878130000000 |
| C | 2.754991000000  | 0.026871000000  | -3.192344000000 |
| C | 1.392808000000  | -0.143496000000 | -3.495184000000 |
| C | 0.455933000000  | -0.179649000000 | -2.478808000000 |
| H | -0.601121000000 | -0.300003000000 | -2.694772000000 |
| H | 1.076051000000  | -0.242242000000 | -4.528945000000 |
| H | 3.485789000000  | 0.063619000000  | -3.994762000000 |

|   |                 |                 |                 |
|---|-----------------|-----------------|-----------------|
| H | 4.227160000000  | 0.248431000000  | -1.646301000000 |
| C | 2.057366000000  | 0.179651000000  | 3.005971000000  |
| H | 1.601818000000  | -0.562969000000 | 3.660933000000  |
| H | 3.745601000000  | -0.086047000000 | 0.712934000000  |
| C | 2.637584000000  | 1.341837000000  | 3.666636000000  |
| C | 2.665393000000  | 1.383100000000  | 5.072597000000  |
| C | 3.175600000000  | 2.430966000000  | 2.956203000000  |
| C | 3.231821000000  | 2.460377000000  | 5.744890000000  |
| H | 2.237910000000  | 0.554701000000  | 5.632875000000  |
| C | 3.737026000000  | 3.507793000000  | 3.631750000000  |
| H | 3.139212000000  | 2.428094000000  | 1.870132000000  |
| C | 3.772061000000  | 3.528410000000  | 5.027907000000  |
| H | 3.248474000000  | 2.469415000000  | 6.830991000000  |
| H | 4.146412000000  | 4.340452000000  | 3.066796000000  |
| H | 4.211331000000  | 4.372331000000  | 5.551266000000  |
| C | -0.832799000000 | 0.108130000000  | 2.404813000000  |
| C | -1.783845000000 | -0.895164000000 | 2.623017000000  |
| C | -0.760347000000 | 1.192680000000  | 3.287087000000  |
| C | -2.646175000000 | -0.817841000000 | 3.714482000000  |
| H | -1.836361000000 | -1.731458000000 | 1.932472000000  |
| C | -1.627236000000 | 1.267823000000  | 4.373627000000  |
| H | -0.031303000000 | 1.978502000000  | 3.113246000000  |
| C | -2.568618000000 | 0.261582000000  | 4.592854000000  |
| H | -3.377974000000 | -1.603459000000 | 3.878151000000  |
| H | -1.568380000000 | 2.117032000000  | 5.048102000000  |
| H | -3.240986000000 | 0.321151000000  | 5.443690000000  |

**TS6b:**

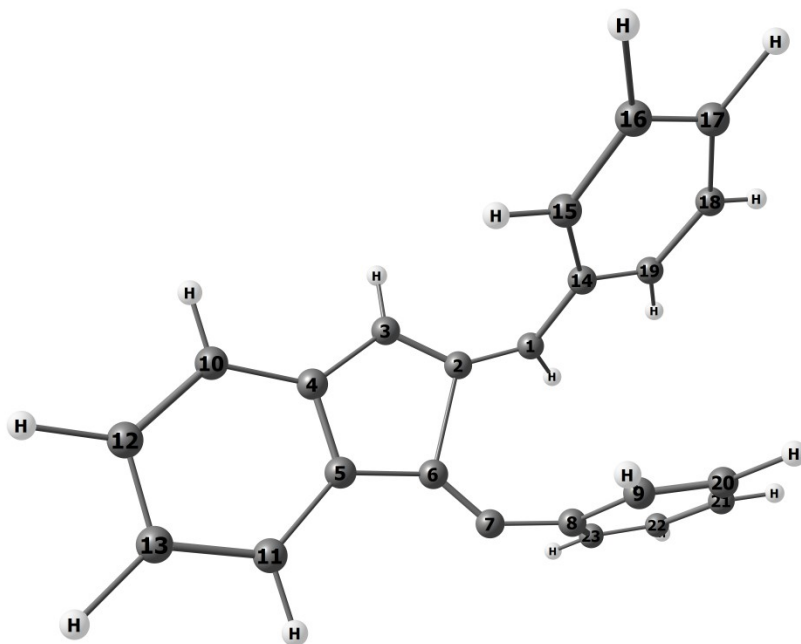

**0 1**

|   |                 |                 |                |
|---|-----------------|-----------------|----------------|
| C | -0.199965000000 | -0.236452000000 | 0.037806000000 |
| C | -0.203997000000 | -0.091408000000 | 1.299488000000 |
| C | 1.428005000000  | 0.119685000000  | 2.140103000000 |
| C | 1.030819000000  | 0.309491000000  | 3.417169000000 |
| C | -0.383683000000 | 0.098932000000  | 3.663803000000 |
| C | -1.078004000000 | -0.120043000000 | 2.460125000000 |
| C | -2.453809000000 | -0.348064000000 | 2.459240000000 |
| C | -3.136149000000 | -0.332319000000 | 3.673073000000 |
| C | -2.450230000000 | -0.108151000000 | 4.874166000000 |
| C | -1.075916000000 | 0.110276000000  | 4.877612000000 |
| H | -2.975512000000 | -0.514941000000 | 1.521761000000 |
| H | -4.210921000000 | -0.486391000000 | 3.687885000000 |
| H | -2.998440000000 | -0.102650000000 | 5.811738000000 |

|   |                 |                 |                 |
|---|-----------------|-----------------|-----------------|
| H | -0.544367000000 | 0.277520000000  | 5.810615000000  |
| C | 2.573125000000  | -0.029545000000 | 1.412448000000  |
| H | 2.671029000000  | 0.522570000000  | 0.477863000000  |
| H | 1.701545000000  | 0.720142000000  | 4.168655000000  |
| C | 3.690236000000  | -0.899802000000 | 1.753768000000  |
| C | 4.820931000000  | -0.908836000000 | 0.915663000000  |
| C | 3.691552000000  | -1.734266000000 | 2.886361000000  |
| C | 5.920633000000  | -1.706844000000 | 1.208271000000  |
| H | 4.823163000000  | -0.279199000000 | 0.028506000000  |
| C | 4.791080000000  | -2.534619000000 | 3.172820000000  |
| H | 2.817860000000  | -1.755269000000 | 3.531827000000  |
| C | 5.911930000000  | -2.524096000000 | 2.339564000000  |
| H | 6.786119000000  | -1.694423000000 | 0.551873000000  |
| H | 4.774294000000  | -3.174568000000 | 4.050453000000  |
| H | 6.769142000000  | -3.150120000000 | 2.568571000000  |
| C | 0.701510000000  | -0.540793000000 | -1.002549000000 |
| C | 0.886437000000  | 0.296382000000  | -2.126764000000 |
| C | 1.551099000000  | -1.659072000000 | -0.833246000000 |
| C | 1.900200000000  | 0.030718000000  | -3.031375000000 |
| H | 0.233567000000  | 1.154230000000  | -2.256133000000 |
| C | 2.554354000000  | -1.926894000000 | -1.763369000000 |
| H | 1.402562000000  | -2.308846000000 | 0.023421000000  |
| C | 2.737766000000  | -1.081287000000 | -2.853042000000 |
| H | 2.046343000000  | 0.685364000000  | -3.885527000000 |
| H | 3.200386000000  | -2.788824000000 | -1.624580000000 |
| H | 3.525461000000  | -1.284355000000 | -3.572764000000 |



TS7a:

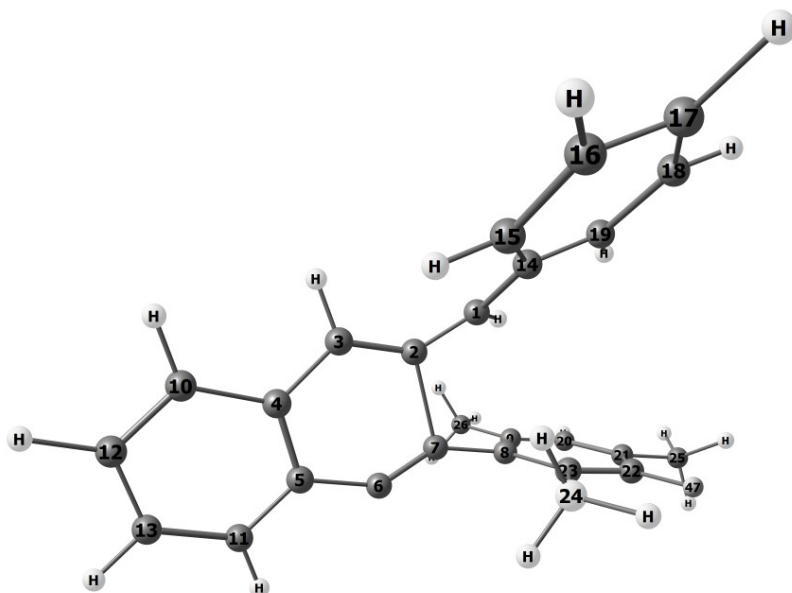

0 1

|   |                 |                 |                 |
|---|-----------------|-----------------|-----------------|
| C | -0.048533000000 | 0.106665000000  | 0.004424000000  |
| C | -0.068974000000 | 0.078207000000  | 1.272151000000  |
| C | 1.742222000000  | 0.020783000000  | 1.815107000000  |
| C | 2.596449000000  | 0.014550000000  | 0.768165000000  |
| C | 2.260577000000  | 0.119531000000  | -0.629999000000 |
| C | 0.902483000000  | 0.095224000000  | -1.045745000000 |
| C | 3.264476000000  | 0.126672000000  | -1.619616000000 |
| C | 2.936214000000  | 0.093542000000  | -2.962473000000 |
| C | 1.590560000000  | 0.027298000000  | -3.362672000000 |
| C | 0.584540000000  | 0.018426000000  | -2.413450000000 |
| H | -0.460414000000 | -0.023719000000 | -2.704966000000 |
| H | 1.340789000000  | -0.012924000000 | -4.418519000000 |
| H | 3.722462000000  | 0.109130000000  | -3.711403000000 |
| H | 4.307091000000  | 0.162426000000  | -1.312219000000 |

|   |                 |                 |                |
|---|-----------------|-----------------|----------------|
| C | 1.792657000000  | 0.159190000000  | 3.170186000000 |
| H | 1.230712000000  | -0.542356000000 | 3.786858000000 |
| H | 3.643131000000  | -0.183957000000 | 1.000993000000 |
| C | 2.359569000000  | 1.300633000000  | 3.873883000000 |
| C | 2.174367000000  | 1.402054000000  | 5.265225000000 |
| C | 3.091822000000  | 2.312399000000  | 3.223526000000 |
| C | 2.714944000000  | 2.462538000000  | 5.983235000000 |
| H | 1.595383000000  | 0.636012000000  | 5.775970000000 |
| C | 3.628644000000  | 3.371893000000  | 3.944180000000 |
| H | 3.225201000000  | 2.264283000000  | 2.145973000000 |
| C | 3.446362000000  | 3.453022000000  | 5.326799000000 |
| H | 2.561547000000  | 2.520227000000  | 7.057047000000 |
| H | 4.189873000000  | 4.143727000000  | 3.425097000000 |
| H | 3.866622000000  | 4.283812000000  | 5.885641000000 |
| C | -0.972171000000 | 0.203597000000  | 2.418042000000 |
| C | -1.505450000000 | -0.954480000000 | 3.003833000000 |
| C | -1.241543000000 | 1.476134000000  | 2.949790000000 |
| C | -2.321831000000 | -0.818488000000 | 4.128119000000 |
| C | -2.060742000000 | 1.566223000000  | 4.074565000000 |
| C | -2.611254000000 | 0.431876000000  | 4.676087000000 |
| C | -1.184327000000 | -2.313727000000 | 2.437929000000 |
| H | -1.527139000000 | -2.398078000000 | 1.401445000000 |
| H | -0.102251000000 | -2.492069000000 | 2.427327000000 |
| H | -1.657805000000 | -3.103453000000 | 3.027036000000 |
| C | -3.518447000000 | 0.562557000000  | 5.873829000000 |
| H | -4.539218000000 | 0.812758000000  | 5.562574000000 |
| H | -3.564203000000 | -0.371321000000 | 6.441224000000 |
| H | -3.175933000000 | 1.355342000000  | 6.545716000000 |

|   |                 |                 |                |
|---|-----------------|-----------------|----------------|
| C | -0.657477000000 | 2.708932000000  | 2.312812000000 |
| H | -0.960426000000 | 3.608544000000  | 2.854787000000 |
| H | 0.437891000000  | 2.667205000000  | 2.304446000000 |
| H | -0.984155000000 | 2.799906000000  | 1.271092000000 |
| H | -2.272876000000 | 2.548315000000  | 4.494155000000 |
| H | -2.738662000000 | -1.712665000000 | 4.588520000000 |

TS7b

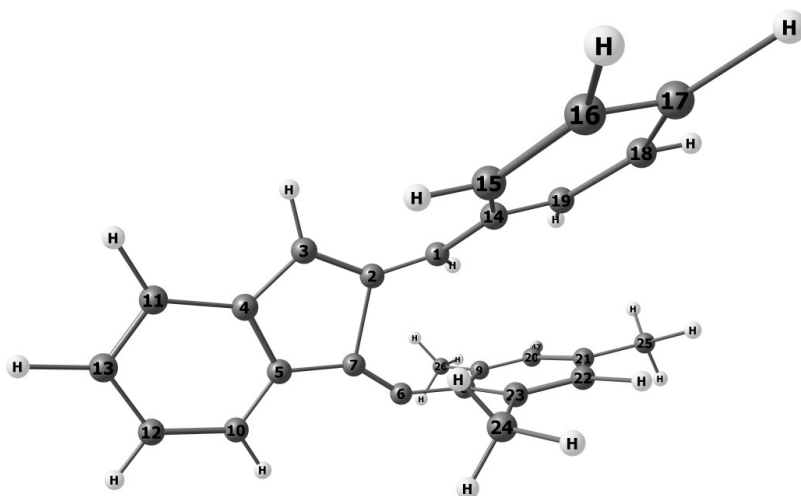

0 1

|   |                 |                 |                |
|---|-----------------|-----------------|----------------|
| C | 0.024269000000  | -0.075162000000 | 0.016093000000 |
| C | 0.019360000000  | -0.046552000000 | 1.284738000000 |
| C | 1.701763000000  | 0.029231000000  | 2.094037000000 |
| C | 1.340567000000  | 0.011493000000  | 3.391088000000 |
| C | -0.079853000000 | -0.172082000000 | 3.654262000000 |
| C | -0.822295000000 | -0.180601000000 | 2.460389000000 |
| C | -2.207336000000 | -0.335638000000 | 2.481221000000 |
| C | -2.850228000000 | -0.463069000000 | 3.711166000000 |
| C | -2.115921000000 | -0.449274000000 | 4.902689000000 |
| C | -0.730752000000 | -0.302794000000 | 4.881959000000 |
| H | -2.766858000000 | -0.341735000000 | 1.550571000000 |
| H | -3.930548000000 | -0.567622000000 | 3.745001000000 |
| H | -2.632224000000 | -0.551930000000 | 5.852720000000 |
| H | -0.161547000000 | -0.296037000000 | 5.807798000000 |
| C | 2.821354000000  | 0.039855000000  | 1.302399000000 |
| H | 2.907771000000  | 0.820296000000  | 0.545221000000 |

|   |                 |                 |                 |
|---|-----------------|-----------------|-----------------|
| H | 2.050186000000  | 0.241384000000  | 4.182855000000  |
| C | 3.873409000000  | -0.958812000000 | 1.298024000000  |
| C | 4.934076000000  | -0.827408000000 | 0.378782000000  |
| C | 3.875704000000  | -2.071010000000 | 2.162664000000  |
| C | 5.956625000000  | -1.766174000000 | 0.328233000000  |
| H | 4.936519000000  | 0.021544000000  | -0.301726000000 |
| C | 4.898771000000  | -3.009702000000 | 2.105364000000  |
| H | 3.061829000000  | -2.192305000000 | 2.872957000000  |
| C | 5.944128000000  | -2.864888000000 | 1.190022000000  |
| H | 6.765604000000  | -1.644330000000 | -0.386905000000 |
| H | 4.881875000000  | -3.862826000000 | 2.777834000000  |
| H | 6.741835000000  | -3.600641000000 | 1.150429000000  |
| C | 0.943787000000  | -0.245885000000 | -1.034938000000 |
| C | 1.326966000000  | 0.852426000000  | -1.852111000000 |
| C | 1.622966000000  | -1.489708000000 | -1.139987000000 |
| C | 2.393554000000  | 0.694492000000  | -2.723631000000 |
| C | 2.677105000000  | -1.598390000000 | -2.045799000000 |
| C | 3.086626000000  | -0.522470000000 | -2.831500000000 |
| C | 0.616718000000  | 2.170635000000  | -1.710126000000 |
| H | -0.465771000000 | 2.045330000000  | -1.816268000000 |
| H | 0.789731000000  | 2.599484000000  | -0.715832000000 |
| H | 0.964353000000  | 2.886596000000  | -2.459287000000 |
| C | 4.236593000000  | -0.660482000000 | -3.794492000000 |
| H | 3.872982000000  | -0.778320000000 | -4.822090000000 |
| H | 4.877563000000  | 0.226800000000  | -3.774711000000 |
| H | 4.849932000000  | -1.533317000000 | -3.554019000000 |
| C | 1.222926000000  | -2.666273000000 | -0.293081000000 |
| H | 1.427425000000  | -2.476183000000 | 0.767462000000  |

|   |                |                 |                 |
|---|----------------|-----------------|-----------------|
| H | 0.150528000000 | -2.870402000000 | -0.380172000000 |
| H | 1.778261000000 | -3.559707000000 | -0.589632000000 |
| H | 2.707106000000 | 1.539470000000  | -3.334801000000 |
| H | 3.213426000000 | -2.542817000000 | -2.116259000000 |
